# Supplementary material
Source: PubMed Central journal article supplement (PMC11108535)

## Supplementary Material

Khoshnood, B., Dacklin, I. and Grabbe, C.

### **Urm1 – An essential regulator of JNK signaling and oxidative stress in *Drosophila melanogaster*.**

***First submitted to Cellular and Molecular Life Sciences, August 2015.***

***Submitted after revision, November 2015.***

#### **Corresponding author:**

*Caroline Grabbe  
Department of Molecular Biology  
Umeå University, Building 6L,  
SE-901 87 Umeå  
Sweden*

*E-mail: caroline.grabbe@molbiol.umu.se*

#### **Supplementary Figure legends**

##### **Supplementary Figure 1. Urm1 and Uba4 is localized in the cytoplasm of larval imaginal disc cells.**

**a.** Coomassie blue stained gel depicting the input control for Fig. 1D, which demonstrates a localization of Urm1 in the cytoplasmic fraction of *Drosophila* embryonic S2 cells. **b.** 3x-Flag-tagged Urm1 and 6x-Myc-tagged Uba4 was expressed in the dorsal part of third instar larval wing imaginal discs using the MS1096-GAL4 driver (UAS/GAL4 system).

Immunohistochemical staining using commercial anti-Flag and anti-Myc (9E10) antibodies reveals a cytoplasmic localization of Urm1 as well as its E1 activating enzyme Uba4. Scale

bar = 10 µm. **c. Urm1 appears to be expressed at comparable levels throughout**

embryogenesis. Immunoblotting of embryonic protein lysates of the age spans indicated in the figure. **d.** Endogenous Urm1 protein is strongly expressed in third instar imaginal discs, where it primarily is localized to the cytoplasmic compartment. FLP/FRT-mediated clonal expression of an RNAi transgene targeting Urm1 (marked by GFP), indicates the specificity of the Urm1 antibody. Scale bar = 10  $\mu$ m. **e.** Quantitative PCR on cDNA extracted from the *w<sup>1118</sup>* control strain at the developmental stages indicated. The levels of Urm1 mRNA is displayed as a relative amount equalized to the ribosomal protein RpL32. The result shown represents an average of two biological replicates.

**Supplementary Figure 2. *Drosophila* Uba4 shares high similarities with both its mammalian and yeast counterparts.**

Sequence alignment of *Drosophila* Uba4 (*CG13090*) with its homologous counterparts in *S. cerevisiae*, *C. elegans*, *M. musculus* and *H. sapiens*, clearly pinpointing the identity of *CG13090* as the fly orthologue of the Urm1 E1 activating enzyme Uba4/MOCS3.

**Supplementary Figure 3. Urm1 interacts genetically with Uba4.**

**a.** Survival into adulthood was monitored in homozygous *Urm1<sup>n123</sup>* mutants, as compared with *Urm1<sup>n123</sup>* flies in which one copy of the Uba4 genomic locus has been removed using two separate fly strains carrying deficiencies uncovering Uba4 (*Df(2L)Exel7038/CyO* and *Df(2L)BSC215/CyO*, respectively). Removal of one copy of Uba4 reduces the survival of *Urm1<sup>n123</sup>* mutant flies from 10,4% to 6.9% when using *Df(2L)BSC215/CyO* and 4.4% for *Df(2L)Exel7038/CyO*. **b.** Uba4 is not affected at the protein level by loss of Urm1 (total fly lysates from homozygous zygotic *Urm1<sup>n123</sup>* flies, as well as *Urm1<sup>rv164</sup>* and *w<sup>1118</sup>* controls). **c.** Misexpression of Urm1 and Uba4 cause similar wing vein defects, a phenotype that is potentiated in flies co-expressing Urm1 and Uba4. MS1096-GAL4 was used to trigger

excessive expression of Urm1 and Uba4, respectively or simultaneously, in developing *Drosophila* wings. Misexpression of Urm1 and Uba4 both cause a specific loss of the anterior cross-vein (acv), in addition to an appearance of excessive wing vein material in other places. The quantification to the left depicts the percentage of flies lacking the acv, and the pictures to the right are representative photographic images of, the different genotypes indicated. Control MS1096> flies represents the progeny of MS1096-GAL4 flies crossed to  $w^{1118}$  controls. Fly crosses were incubated at 25°C for moderate expression or at 29°C for strong expression.  $n > 38$  for all genotypes tested. Scale bar = 500  $\mu\text{m}$ .

**Supplementary Figure 4. Flies with reduced levels of Urm1 display an increased resistance when exposed to oxidative stress induced by H<sub>2</sub>O<sub>2</sub>.**

**a.** Flies in which the level of Urm1 has been strongly reduced by ubiquitous expression of an Urm1-RNAi transgenic construct, show an increased survival when exposed to oxidative stress induced by 2% H<sub>2</sub>O<sub>2</sub> (equivalent to ~0.6 M). Flies with reduced Urm1 levels displayed a median survival of 112 hours on 2% H<sub>2</sub>O<sub>2</sub>, as compared with 74 hours in the *Act5C*> $w^{1118}$  controls. **b.** Prx5 is covalently conjugated by Urm1 in response to oxidative stress induced by 10 mM paraquat, as indicated by a size shift of Prx5 from ~17 kDa to ~30 kDa, which is in agreement with the addition of one Flag-tagged Urm1 moiety. The immunoblot to the left displays the Flag- IP showing urmylated Prx5, whereas the right immunoblot depicts non-conjugated Prx5.

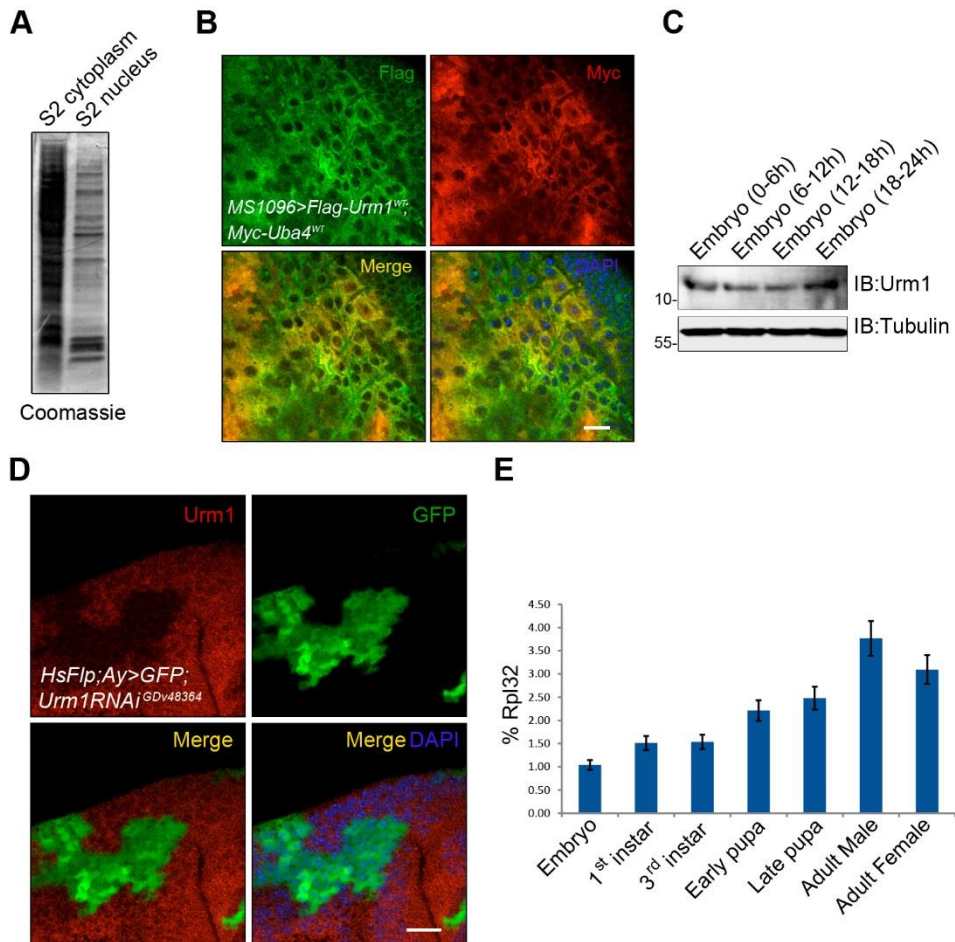

```

ScUba4 -----MNdYhLedttSeLe-ALrLEnaqlreqLakreDSS
CeUba4 -----MNdDqvw-----
DmUba4 mmesevdsertmlkrEiAeLrAalngkEQcLreLdS1fSfAtrpEqEvvgnDL-esPDvA
HsMOCS3 -----MASrEEV1ALQAEVaqrEEeLnSLkqkLAsALLaEqEpperLVpvsplp
MmMOCS3 -----MAapECVAALQAEItrrEEeLaSLkrrLAAALtaEpEperplrVpPpLA

ScUba4 rdypLSleEYqRYgRQmIveEttgGvAGQVKLKNtkVLvVGAGGLGCPAlpYLAGAGVCGi
CeUba4 --AgiSkkdagRYSRQLlvdF-GVsGQknLKNlnVLIVGAGGLGCFvAtYlGAAGIGti
DmUba4 vhtkLtnDdEaRYSRQLLpDF-GVqGQLKKNSSvLIVGLGGLGCPAAQYLAAGCghL
HsMOCS3 pkAaLSrDEILRYSRQLVLEL-GVhGQLRLgtAcVLIVGcGGLGCP1AQYLAAGVGRl
MmMOCS3 prAaLSrDEILRYSRQLLLEL-GVrGQLRLaaAVLVVGCcGGLGCP1AQYLAAGVGRl

ScUba4 GiVdNdVvEtsNLHRQVLHdsSRvGMlKceSArqyitkLNphInvVtYpvrLnssNAfDi
CeUba4 GiVDYDhisldNLHRQVaykEdQvGkSKAqalAdniklqNSdLnvqvhntslDSSNAMqL
DmUba4 GLVDYDvEtrSNFHRQiLHsEdRcGMSKAeSArIaLleLNphcEiqchsrmlyPhNAMhi
HsMOCS3 GLVDYDvVEmSNLaRQVLHgEALAGqAKAFSAAsLrrLNSaVECVpYtqaitPatALDL
MmMOCS3 GLVDhDvVETSNLaRQVLHgEAQAGeSKArSAAaaLrrLNSaVECVaYpralaeDwALDL

ScUba4 FkGYNyilDCTDsplTRYLVsDvaVnLGitvVSAsgLgtEGQLTilnfnniGPCYRCfyP
CeUba4 FknYeIVcDCTDNVaTRYLINDvCVLLniPLVsgSALRwdGQLsVYHYgSDcPCYRCLFP
DmUba4 iRGYDVVLDCTDNVPTRYLsDACVMLskPLVsgSALRkmdGQLTVYVyan-GPCYRCIFP
HsMOCS3 vRrYDVVADCSdNVPTRYLVNDACVLaGrPLVSAALRFEGQiiTVYHYdG-GPCYRCIFP
MmMOCS3 vRGYDVVADCSdNVPTRYLVNDACVLaGrPLVSAALRFEGQmTVYHYdG-GPCYRCVFP

ScUba4 tPPPNvAVTSqCqeGGViGpciG1VgtMmAvEtLkLilGIytnenfSpfLmLysGfpqqsl
CeUba4 sPPdPnsVTNCneGGVLGpIvGVIGsMQALEVmKIAAkv--rttLaGqLLFDGr-eGks
DmUba4 vPPPEAVTNCgDGGVLGAVtGtIGaMQALEaiKVivGM--GdvLaGrLLiFDGg-sGvF
HsMOCS3 qPPPEaEtVTNCaDGGVLGvvtGVlGCQALEVLKIAAGL--GpsySGsLLFDal-rGhF
MmMOCS3 rPPPEtVTNCaDGGVLGAVpGVlGCaQALEVLKIAAGL--GssySGsmLLFDG1-gGhF

ScUba4 RTfkmRgRqekClcCGkNrTITkeaiEkgEInYElFCGArnyvCE-----FDERISVd
CeUba4 RTIRLRkRdPkCeVCGdNPTITa-----pIDYv1FCGAgAhDKiEnkLLElsdRvNVT
DmUba4 RnIRIRsRPNChMCsaqPliTe-----lInYEmFCGmhATDKnnpmlLsTDERISVE
HsMOCS3 RSIRLRsRRlDcaCgerPtvTd-----lLDYEAFCGSsATDKCrsLqLLsPEERVSVT
MmMOCS3 RrIRLRrRRPDCvVCGqgPtvTr-----lqDYEAFCGSsATDKCraLkLlCEERISVT

ScUba4 afqRiykddeflakHifLDVRPshhYEIsHfPEAvNIPiKnLrdMngDl--KklqekL--
CeUba4 EYRnkrreqP---vLLdTRPslEFEIaHLPEaINvtLKEcrsLsAedisnrLGlq---
DmUba4 DYqqkiqA-qP---HLLiDVRPtaEFEICqLPEAvNvPL--vEiLDdsyL-KrLkqkL--
HsMOCS3 DYKRLlDSgAf---HLLLDVRPQvEvdICrLPhALhIPLKhLErDAESL-KllkeAiwe
MmMOCS3 DYKRLlDSgAP---HvLLDVRPQvEvdICrLPhsLhIPLsQLErrDADsL-KllGaALrK

ScUba4 ----psvekdsnIVi1CRyGNDSQ1atRlLkd----kfgfsnVRDvRGGyfykiddIDq
CeUba4 ----ntehsdvfvIChrGNDSQrAVlllre----kLvdiKfRDIIggyeQwAlkInd
DmUba4 ----EdkelPIV1VCRrGNDSQiAVQhLrN----rfpthfVRDlIGGLhAwtnsvDp
HsMOCS3 eKQgtQEGAavPIyVICK1GNDSQkAVKilQSLSAaqELdplTVRDVVGGLmAWAaKIDg
MmMOCS3 gKQesQEgvalPvyVICK1GNDSQkAVKvLQSLTAvpELds1tVqDIVGGLmAWAaKIDg

ScUba4 TiPkY
CeUba4 mFFly
DmUba4 sFPiY
HsMOCS3 TFPqY
MmMOCS3 TFPqY
    
```

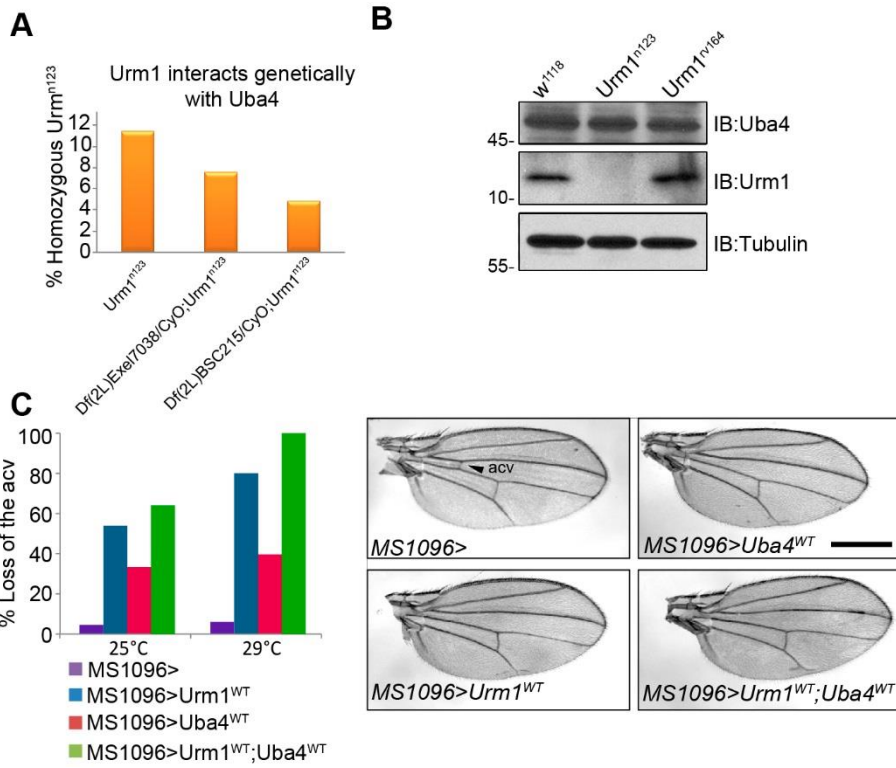

**A**

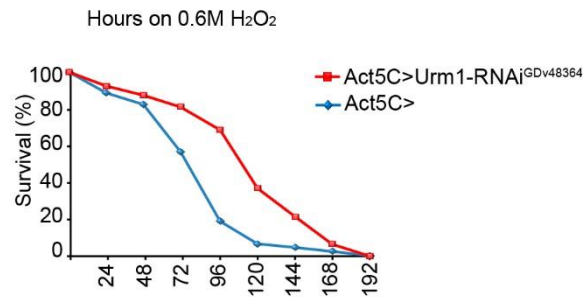

**B**

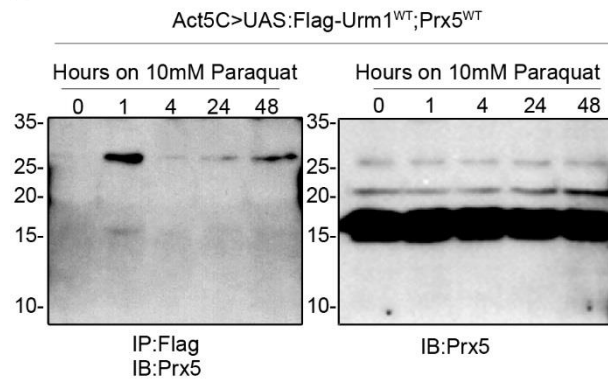

Supplement: 18_2015_2121_MOESM1_ESM.pdf [file 18_2015_2121_MOESM1_ESM.pdf]
